# Supplementary material for: Metagenomic analysis of common intestinal diseases reveals relationships among microbial signatures and powers multi-disease diagnostic models
Source: bioRxiv or medRxiv preprint supplement (doi:10.1101/19013136), 2021-01-29

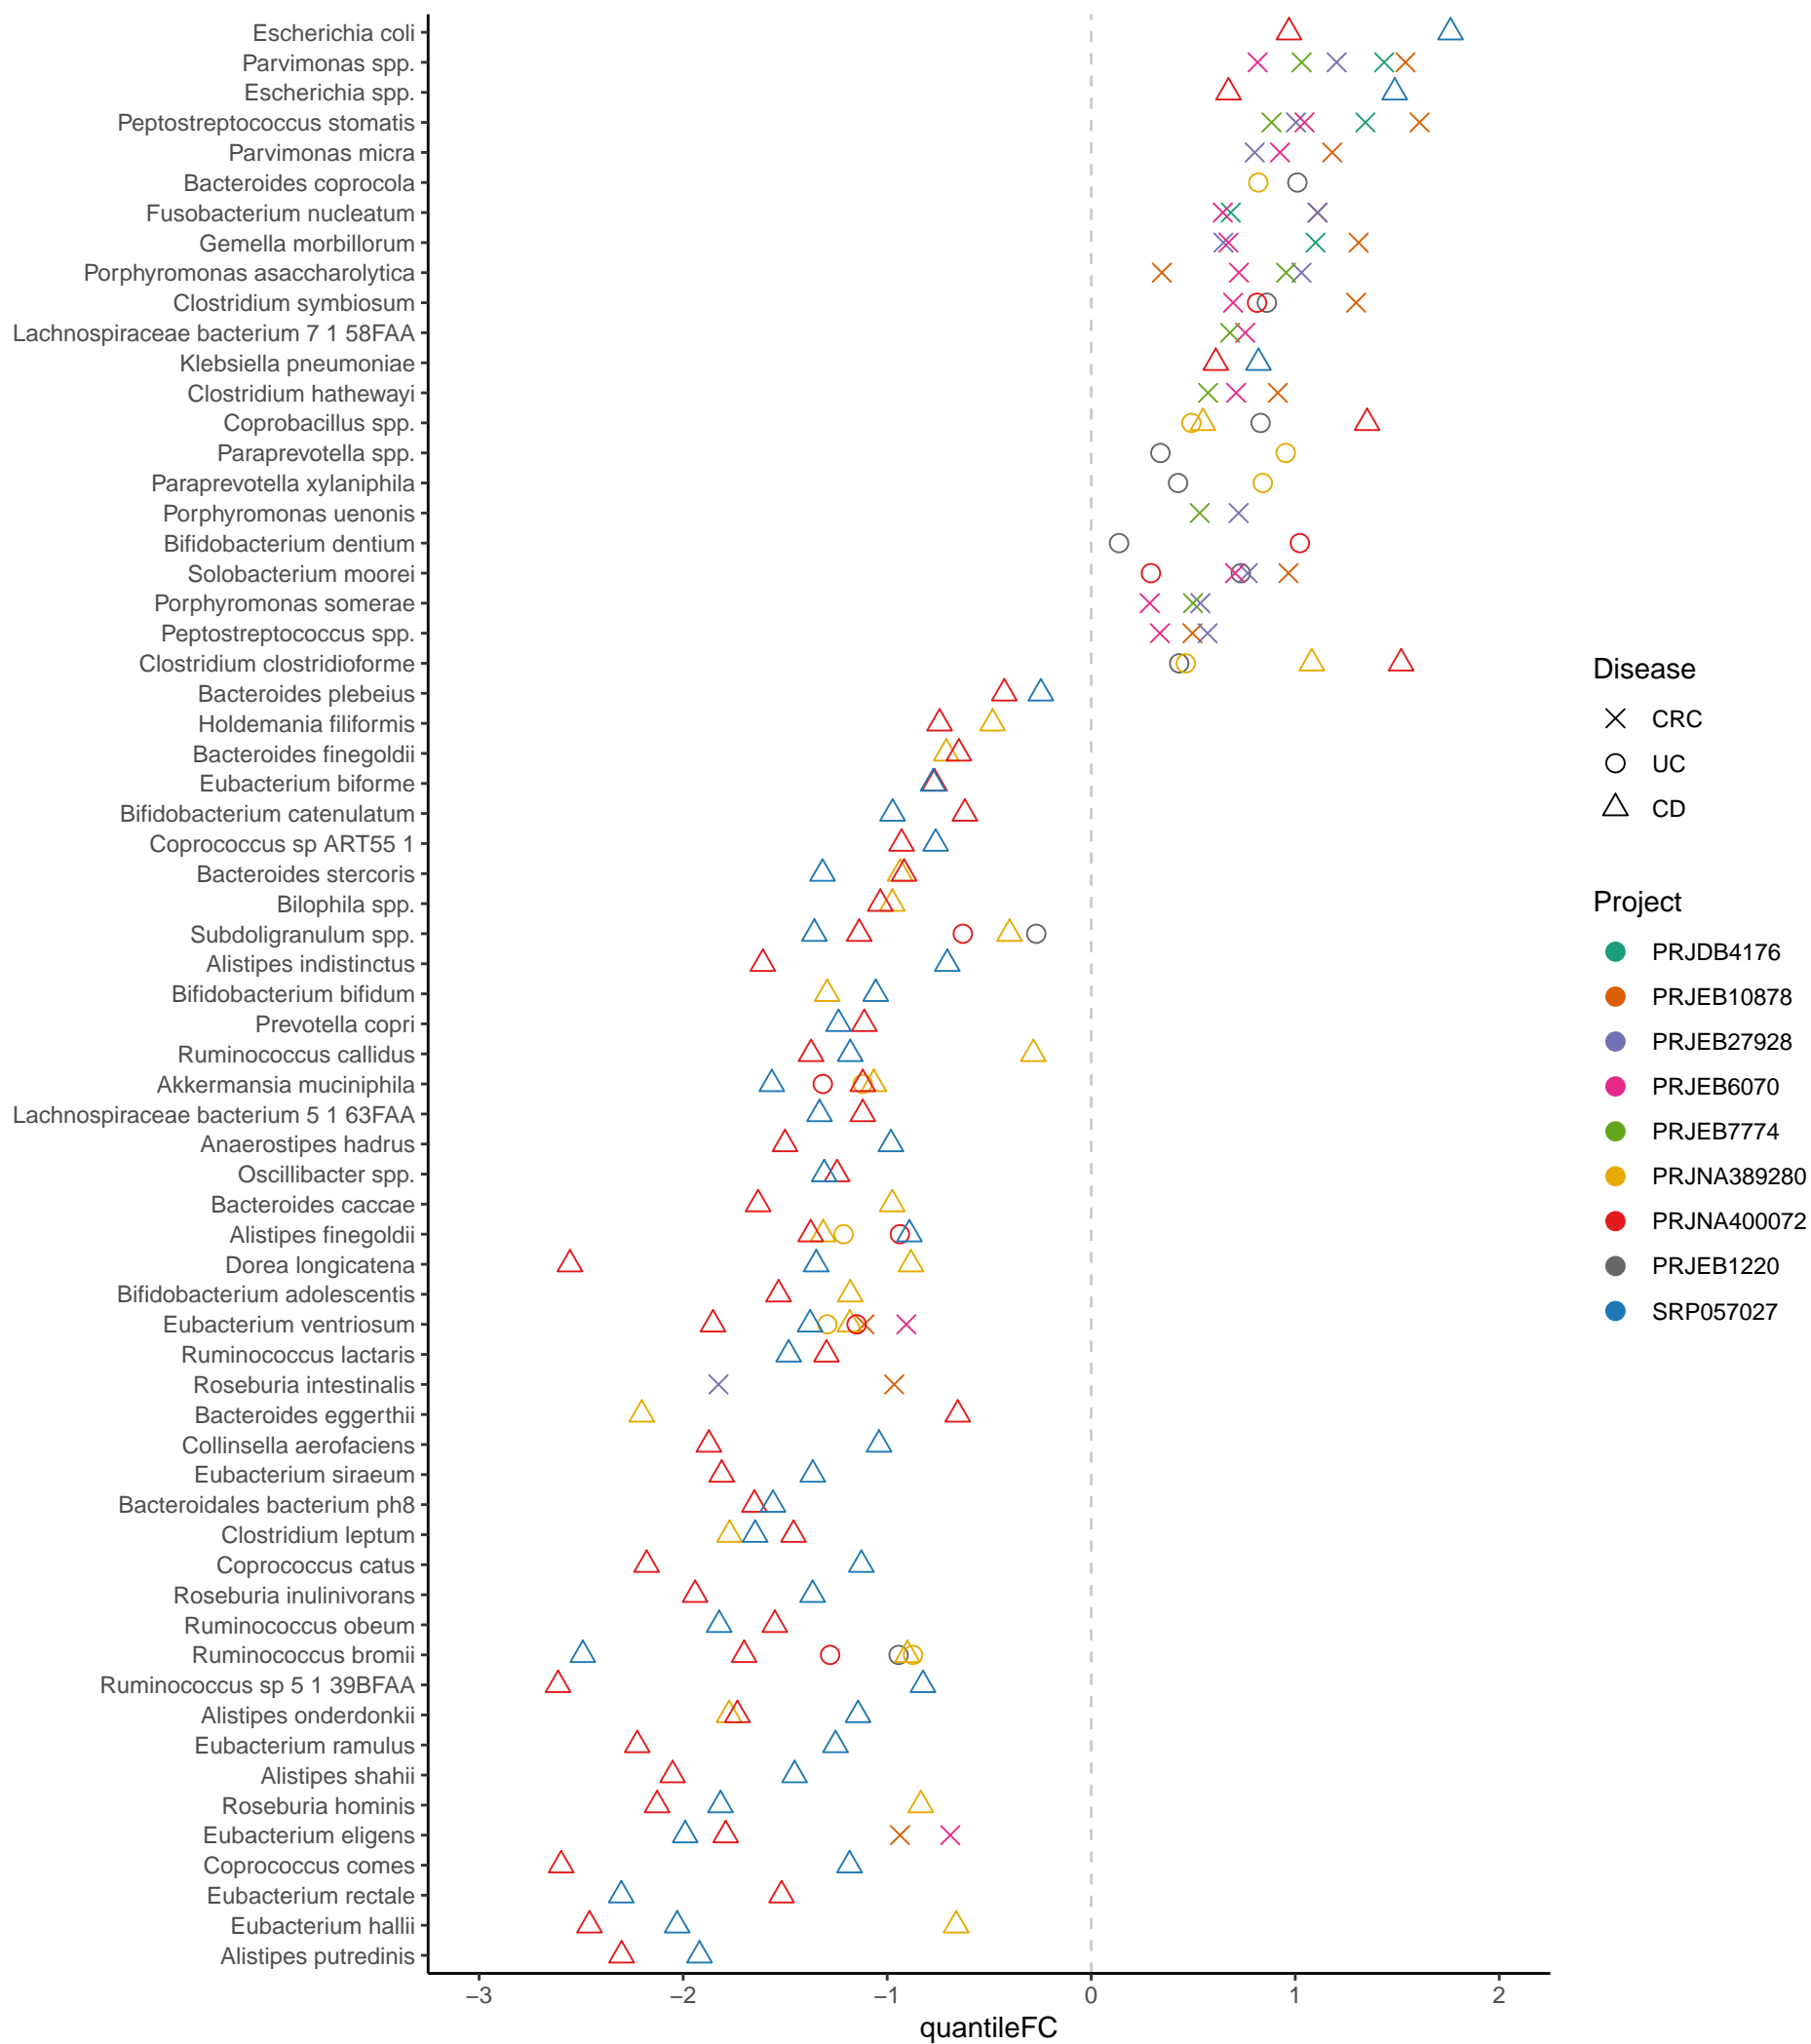

Supplement: Supplementary file [file 19013136-4.pdf]
